# Supplementary material for: The whole is greater than the sum of its parts: a holistic graph-based assessment approach for natural hazard risk of complex systems
Source: Copernicus journal article supplement (doi:10.5194/nhess-20-521-2020), 2020-02-24
Supplement: Supplementary file [file nhess-20-521-2020-supplement-title-page.pdf › nhess-20-521-2020-supplement-title-page.pdf]

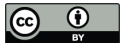

## *Supplement of*

# **The whole is greater than the sum of its parts: a holistic graph-based assessment approach for natural hazard risk of complex systems**

**Marcello Arosio et al.**

*Correspondence to:* Marcello Arosio ([marcello.arosio@iusspavia.it](mailto:marcello.arosio@iusspavia.it))

- [nhess-20-521-2020-supplement-title-page.pdf](#)
- 00\_Arosio\_NHESS
  - Asset
    - \* Assets\_prop.cpg
    - \* Assets\_prop.dbf
    - \* Assets\_prop.prj
    - \* Assets\_prop.qpj
    - \* Assets\_prop.shp
    - \* Assets\_prop.shx
  - Bacini\_Federali\_.shp
    - \* .DS\_Store
    - \* Bacini\_federali.dbf
    - \* Bacini\_federali.prj
    - \* Bacini\_federali.shp
    - \* Bacini\_federali.shx
  - Border
    - \* Border\_CDMX.dbf
    - \* Border\_CDMX.prj
    - \* Border\_CDMX.sbn
    - \* Border\_CDMX.sbx
    - \* Border\_CDMX.shp
    - \* Border\_CDMX.shx

The copyright of individual parts of the supplement might differ from the CC BY 4.0 License.
